# Supplementary material for: Biosynthesis of Polyhydroxyalkanoate Terpolymer from Methanol via the Reverse β-Oxidation Pathway in the Presence of Lanthanide
Source: MDPI journal article supplement (doi:10.3390/microorganisms10010184), 2022-01-15
Supplement: s1 [file s1]

Table S1. List of primers used in the study.

| Primer                                         | Sequence (5'-3')                                            |
|------------------------------------------------|-------------------------------------------------------------|
| Construction of pK18_ phaC <sub>NSDG</sub>     |                                                             |
| phaC <sub>Me</sub> _up1000                     | <u>cgg</u> aattcGAAGCCGAAGGCGTGGATCGG                       |
| phaC <sub>Me</sub> _down1000                   | <u>cgg</u> aattcGACGATGCCGGGATCGAACAGCATG                   |
| InvphaC_N                                      | GCGACACGTCCTCCCAAAGGTCCG                                    |
| InvphaC-C                                      | GGGCATGAAGGTGTGAGGGATCG                                     |
| phaC <sub>Ac</sub> _N                          | ATGAGCCAACCATCTTATGGCCCGC                                   |
| phaC <sub>Ac</sub> _C                          | TCATGCGGCGTCCTCCTCTGTTGGG                                   |
| Construction of pK18_emd                       |                                                             |
| ccrMe_C-up1000                                 | ACGTGCACAAGGGCGAGTACCACATCGC                                |
| ccrMe_C-down1000                               | GACCGGCGTCGCCTCTCGCATTCG                                    |
| ccrMe_C-Inv1                                   | CG <u>CGGATCCT</u> CACATCGCCTTGAGCGGGCCG                    |
| ccrMe_C-Inv2                                   | GCCAGTCCACGTGACACGAAGAAG                                    |
| Construction of pCM80Km_emd                    |                                                             |
| emd_N                                          | ACATGCATGCAAGCTTAGGGAGTTCCATATGGCCAAGTGCCTGCTGACGT          |
| emd_C                                          | <u>GGAATTCC</u> GGATCCTCTAGACTACTTGGTGTGCTTGCCCTTCTTCGCGATG |
| Construction of pCM80Km_emdbktB                |                                                             |
| bktB_N                                         | <u>CGGGATCC</u> AGGGAGCAAAGTCATGACGCGTGAAGTGGTAGTGGTA       |
| bktB_C                                         | <u>GGAATTCT</u> CAGATACGCTCGAAGATGGCGGCAATGCCC              |
| Construction of pCM80Km-ehcjb and pCM80Km-hcjb |                                                             |
| A0602-F                                        | ATGCAAATCCAAGGCAACGTATTCA                                   |
| A0602-R-Fus                                    | ATGTATTTGCCTTTACTTGGGCTGCATCCGA                             |
| A3307-F-Fus                                    | CCAAGTAAAGGCAAATACATAGGAGAAGACA                             |
| A3307-R                                        | GCCTTAGCGATGCTGGAAATT                                       |
| A0602A3307up                                   | GCTCTAGAAAGGGAGATTATCATATGCAAATCCAAGGCAACGTATTCAT           |
| A0602A3307down                                 | <u>GGAATTCC</u> AGGGAGCTATCGACATGCGTACCATCGCATCGCTGGA       |
| phaJup                                         | <u>GGAATTCT</u> TAGCGATGCTGGAAATTCGGGCTG                    |
| phaJdown                                       | CG <u>GGATCCT</u> CACCCGTAGCGGCGCGTGATCGACT                 |
| Construction of pCM80PphaA-hcjb                |                                                             |
| PphaA-FwNheI                                   | GTTCTC <u>GCTAGCC</u> GTTGCGACACCTCCCGCTTC                  |
| PphaA-Rv                                       | CGTGACGTTCTCCTCATTCGGC                                      |
| pCM80-Inv5                                     | CCCGACCAAGCGGGAAGCTAGCT                                     |
